# Supplementary material for: E3 Ubiquitin Ligase FBXO3 Drives Neuroinflammation to Aggravate Cerebral Ischemia/Reperfusion Injury
Source: MDPI journal article supplement (doi:10.3390/ijms232113648), 2022-11-07
Supplement: s1 [file s1]

**Table S1.** Relative primer sequences for siRNA of FBXO3 (rat)

| Gene name     | Primer sequences                                                 |
|---------------|------------------------------------------------------------------|
| si-231 (rat)  | Forward: GGAAGAAUCAGUGCUGGAATT<br>Reverse: UCCAGCACUGAUUCUUCCTT  |
| si-857 (rat)  | Forward: GCAACAACUGGAGAUUUUATT<br>Reverse: UAAUAUCUCCAGUUGUUGCTT |
| si-1211 (rat) | Forward: CCACGAUCCAU AUGGCAUTT<br>Reverse: AUGCCAUAUGGAAUCGUGGTT |
| NC (rat)      | Forward: UUCUCCGAACGUGUCACGUTT<br>Reverse: ACGUGACACGUUCGGAGAATT |

**Table S2.** Relative primer sequences for siRNA of FBXO3 (mouse)

| Gene name       | Primer sequences                                                     |
|-----------------|----------------------------------------------------------------------|
| si-174 (mouse)  | Forward: GCUAUGUUAGUCGAAGACUUATT<br>Reverse: UAAGUCUUCGACUACAUAAGCTT |
| si-480 (mouse)  | Forward: CGGAUGAUUAUCGCUGUUCAUTT<br>Reverse: AUGAACAGCGAUAAUCAUCCGTT |
| si-1100 (mouse) | Forward: CCUGGAGUAGUCGGUGAAUUUTT<br>Reverse: AAAUUCACCGACUACUCCAGGTT |
| NC (mouse)      | Forward: UUCUCCGAACGUGUCACGUTT<br>Reverse: ACGUGACACGUUCGGAGAATT     |

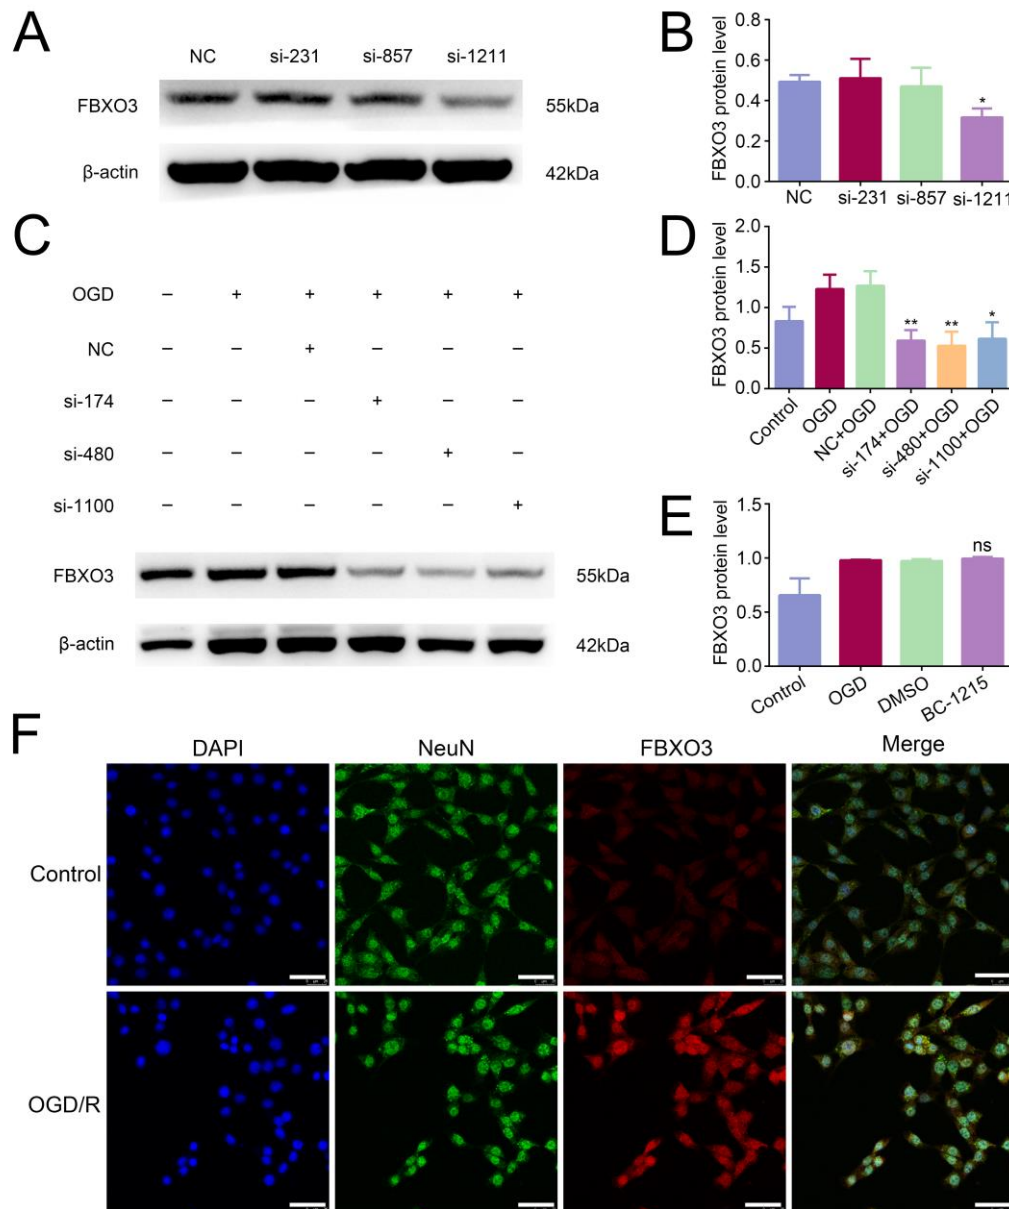

**Figure S1.** (A-B). Western blotting analysis of FBXO3 in the cortex of SD rats with different siRNA treatment. Si-1211 was chosen for relative experiments *in vivo* for its successful interference of FBXO3 protein expression. (C-D). Western blotting analysis of FBXO3 in HT22 cells at OGD 4 h/R 24 h with or without siRNA treatment. Si-480 was chosen for relative experiments *in vitro* for its successful interference of FBXO3 protein expression. (E). Analysis of FBXO3 protein level at OGD 4 h/R 24 h with DMSO or BC-1215 treatment. (F). IF colocalization of FBXO3 (red) along with NeuN (green) in HT22 cells with or without OGD/R treatment. Statistics for each group are expressed as mean  $\pm$  SD ( $n \geq 6$ ). \* $p < 0.05$ , \*\* $p < 0.01$ , vs. NC group or NC+OGD group.
